# Supplementary material for: Absence of Islet Autoantibodies and Modestly Raised Glucose Values at Diabetes Diagnosis Should Lead to Testing for MODY: Lessons From a 5-Year Pediatric Swedish National Cohort Study
Source: Oxford University Press journal article supplement (doi:10.2337/dc19-0747), 2019-11-08
Supplement: dc190747supplementarydata.pdf [file dc190747supplementarydata.pdf]

SUPPLEMENTARY DATA

**Absence of islet autoantibodies and modestly raised glucose values at diabetes diagnosis should lead to testing for MODY: Lessons from a 5-year pediatric Swedish national cohort study.**

**Short running title: Identifying MODY at diabetes diagnosis**

**Authors**

Prof A Carlsson MD<sup>1\*</sup>, Prof M Shepherd PhD<sup>2\*</sup>, Prof S Ellard PhD<sup>2,3</sup>, Ass Prof M Weedon PhD<sup>2</sup>, Prof Å Lernmark PhD<sup>4</sup>, Ass Prof G Forsander MD<sup>5</sup>, K Colclough BSc<sup>3</sup>, Q Brahim MSc<sup>4</sup>, Dr C Valtonen-Andre MD<sup>6</sup>, Prof S.A Ivarsson MD<sup>4</sup>, Ass Prof H Elding Larsson MD<sup>4</sup>, Ass Prof U Samuelsson MD<sup>7</sup>, Dr E Örtqvist MD<sup>8</sup>, Prof LGroop MD<sup>9</sup>, Prof J Ludvigsson MD<sup>7#</sup>, Prof C Marcus MD<sup>10#+</sup>, Prof A.T Hattersley MD<sup>2#+</sup>

SUPPLEMENTARY DATA

**Supplementary Table 1.** Clinical characteristics of subjects.

| Phenotype                       | All Patients |                    | Autoantibody +ve |                    | Autoantibody -ve |                    | P                   |
|---------------------------------|--------------|--------------------|------------------|--------------------|------------------|--------------------|---------------------|
|                                 | N            | mean (SD) or % (N) | N                | mean (SD) or % (N) | N                | mean (SD) or % (N) |                     |
| <b>Clinical features</b>        |              |                    |                  |                    |                  |                    |                     |
| <b>N</b>                        |              |                    | 3471             |                    | 462              |                    |                     |
| Sex (% female)                  | 3933         | 45 (1755)          | 3471             | 45 (1566)          | 462              | 41 (189)           | 0.09                |
| Age at diagnosis (yrs)          | 3933         | 10.1 (4.4)         | 3471             | 9.9 (4.4)          | 462              | 11.6 (4.5)         | 5x10 <sup>-14</sup> |
| Parental Diabetes (%)           | 3933         | 13 (500)           | 3471             | 11 (379)           | 462              | 26 (121)           | 4x10 <sup>-17</sup> |
| Polyuria (%)                    | 3608         | 94 (3392)          | 3233             | 96 (3104)          | 375              | 77 (288)           | 2x10 <sup>-33</sup> |
| Polydipsia (%)                  | 3597         | 93 (3363)          | 3225             | 95 (3077)          | 372              | 77 (286)           | 1x10 <sup>-29</sup> |
| Weight loss (%)                 | 3487         | 75 (2625)          | 3129             | 77 (2423)          | 358              | 56 (202)           | 2x10 <sup>-16</sup> |
| BMI (SDS)                       | 3378         | -0.35 (1.55)       | 3020             | -0.44 (1.49)       | 358              | 0.43 (1.83)        | 1x10 <sup>-16</sup> |
| Acanthosis Nigricans (%)        | 3490         | 1 (44)             | 3136             | 1 (17)             | 354              | 8 (27)             | 8x10 <sup>-17</sup> |
|                                 |              |                    |                  |                    |                  |                    |                     |
| <b>Investigations- early</b>    |              |                    |                  |                    |                  |                    |                     |
| Plasma glucose (mmol/L)         | 3569         | 26.5 (9.1)         | 3198             | 26.9 (8.9)         | 371              | 23.1 (10.8)        | 1x10 <sup>-15</sup> |
| HbA1c (%)                       | 3541         | 10.6 (4.5)         | 3161             | 10.7 (4.5)         | 380              | 9.9 (5.1)          | 9x10 <sup>-8</sup>  |
| DKA (%)                         | 3933         | 15 (601)           | 3471             | 17 (574)           | 462              | 6 (27)             | 6x10 <sup>-11</sup> |
|                                 |              |                    |                  |                    |                  |                    |                     |
| <b>Investigations – delayed</b> |              |                    |                  |                    |                  |                    |                     |
| High risk HLA (%)               | 3876         | 69 (2693)          | 3419             | 73 (2486)          | 457              | 45 (207)           | 2x10 <sup>-30</sup> |
| C peptide (nmol/mol)            | 3596         | 0.35 (0.44)        | 3184             | 0.28 (0.23)        | 412              | 0.85 (0.98)        | 3x10 <sup>-36</sup> |
| C Peptide <0.2 (nmol/mol) (%)   | 3596         | 40 (1434)          | 3184             | 42 (1337)          | 412              | 24 (97)            | 1x10 <sup>-13</sup> |

Plasma glucose and C peptide results based on log10 transformation.

SUPPLEMENTARY DATA

**Supplementary Table 2. Comparing the research genetically tested autoantibody negative group with those not tested to assess if representative.**

| Phenotype                       | Research tested<br>Autoantibody negative |                       | Not tested<br>Autoantibody negative |                       | P value<br>* |
|---------------------------------|------------------------------------------|-----------------------|-------------------------------------|-----------------------|--------------|
|                                 | N                                        | mean (SD)<br>or % (N) | N                                   | mean (SD)<br>or % (N) |              |
| <b>Clinical features</b>        |                                          |                       |                                     |                       |              |
| N                               | 227                                      |                       | 159                                 |                       |              |
| Sex (% female)                  | 227                                      | 37 (85)               | 159                                 | 42 (66)               | 0.46         |
| Age at diagnosis (yrs)          | 227                                      | 12.06 (4.47)          | 159                                 | 10.88 (4.57)          | 0.01         |
| Parental Diabetes (%)           | 227                                      | 25 (56)               | 159                                 | 15 (24)               | 0.03         |
| Polyuria (%)                    | 189                                      | 79 (150)              | 122                                 | 87 (106)              | 0.10         |
| Polydipsia (%)                  | 186                                      | 80 (149)              | 122                                 | 85 (104)              | 0.29         |
| Weight loss (%)                 | 178                                      | 58 (104)              | 118                                 | 69 (81)               | 0.09         |
| BMI (SDS)                       | 178                                      | 0.42 (1.96)           | 118                                 | 0.28 (1.85)           | 0.55         |
| Acanthosis Nigricans (%)        | 178                                      | 9 (16)                | 115                                 | 8 (9)                 | 0.83         |
| <b>Investigations- early</b>    |                                          |                       |                                     |                       |              |
| Plasma glucose (mmol/L)         | 186                                      | 23.6 (10.2)           | 121                                 | 25.9 (11.2)           | 0.05         |
| HbA1c (%)                       | 186                                      | 10.3 (5.0)            | 123                                 | 10.3 (5.1)            | 0.88         |
| DKA (%)                         | 227                                      | 6 (13)                | 159                                 | 8 (13)                | 0.41         |
| <b>Investigations - delayed</b> |                                          |                       |                                     |                       |              |
| High risk HLA (%)               | 226                                      | 46 (103)              | 155                                 | 53 (82)               | 0.18         |
| C peptide (nmol/mol)            | 213                                      | 0.86 (1.01)           | 131                                 | 0.83 (1.07)           | 0.08         |

Plasma glucose and C-peptide results based on log10 transformation.

\* To correct for the 13 variables analysed a p value of < 0.004 should be considered significantly different.

SUPPLEMENTARY DATA

**Supplementary Table 3. Comparing the research tested autoantibody positive group with those not tested to assess if representative.**

| Phenotype                       | Research tested<br>Autoantibody positive |                       | Not tested<br>Autoantibody positive |                       | P value<br>*       |
|---------------------------------|------------------------------------------|-----------------------|-------------------------------------|-----------------------|--------------------|
|                                 | N                                        | mean (SD)<br>or % (N) | N                                   | mean (SD)<br>or % (N) |                    |
| <b>Clinical features</b>        |                                          |                       |                                     |                       |                    |
| N                               | 177                                      |                       | 3294                                |                       |                    |
| Sex (% female)                  | 177                                      | 49 (87)               | 3294                                | 45 (1479)             | 0.28               |
| Age at diagnosis (yrs)          | 177                                      | 9.54 (4.43)           | 3294                                | 9.91 (4.39)           | 0.27               |
| Parental Diabetes (%)           | 177                                      | 8 (15)                | 3294                                | 11 (364)              | 0.32               |
| Polyuria (%)                    | 156                                      | 95 (148)              | 3077                                | 96 (2956)             | 0.40               |
| Polydipsia (%)                  | 156                                      | 94 (147)              | 3069                                | 95 (2930)             | 0.43               |
| Weight loss (%)                 | 146                                      | 73 (107)              | 2983                                | 78 (2316)             | 0.22               |
| BMI (SDS)                       | 143                                      | -0.17 (1.56)          | 2877                                | -0.45 (1.49)          | 0.03               |
| Acanthosis Nigricans (%)        | 154                                      | 1 (2)                 | 2982                                | 1 (15)                | 0.20               |
| <b>Investigations- early</b>    |                                          |                       |                                     |                       |                    |
| Plasma glucose (mmol/L)         | 155                                      | 25.3 (7.4)            | 3043                                | 27.0 (8.9)            | 0.02               |
| HbA1c (%)                       | 154                                      | 10.5 (4.5)            | 3007                                | 10.7 (4.5)            | 0.22               |
| DKA (%)                         | 177                                      | 12 (21)               | 3294                                | 17 (553)              | 0.10               |
| <b>Investigations - delayed</b> |                                          |                       |                                     |                       |                    |
| High risk HLA (%)               | 177                                      | 72 (128)              | 3242                                | 73 (2358)             | 0.93               |
| C peptide (nmol/mol)            | 166                                      | 0.34 (0.263)          | 3018                                | 0.28 (0.231)          | 4x10 <sup>-4</sup> |
| <b>Antibodies</b>               |                                          |                       |                                     |                       |                    |
| 1 antibody +ve                  | 177                                      | 23 (40)               | 3294                                | 19 (618)              | 0.20               |
| 2 antibody +ve                  | 177                                      | 35 (61)               | 3294                                | 34 (1108)             | 0.81               |
| 3 antibody +ve                  | 177                                      | 31 (54)               | 3294                                | 34 (1117)             | 0.37               |
| 4 antibody +ve                  | 177                                      | 12 (22)               | 3294                                | 14 (451)              | 0.74               |

Plasma glucose and C peptide results based on log10 transformation.

\* To correct for the 17 variables analysed a p value of < 0.003 should be considered significantly different.

SUPPLEMENTARY DATA

**Supplementary Figure 1. Breakdown of autoantibody positivity in 3933 individuals tested**  
Venn diagram produced using venndiag stata package

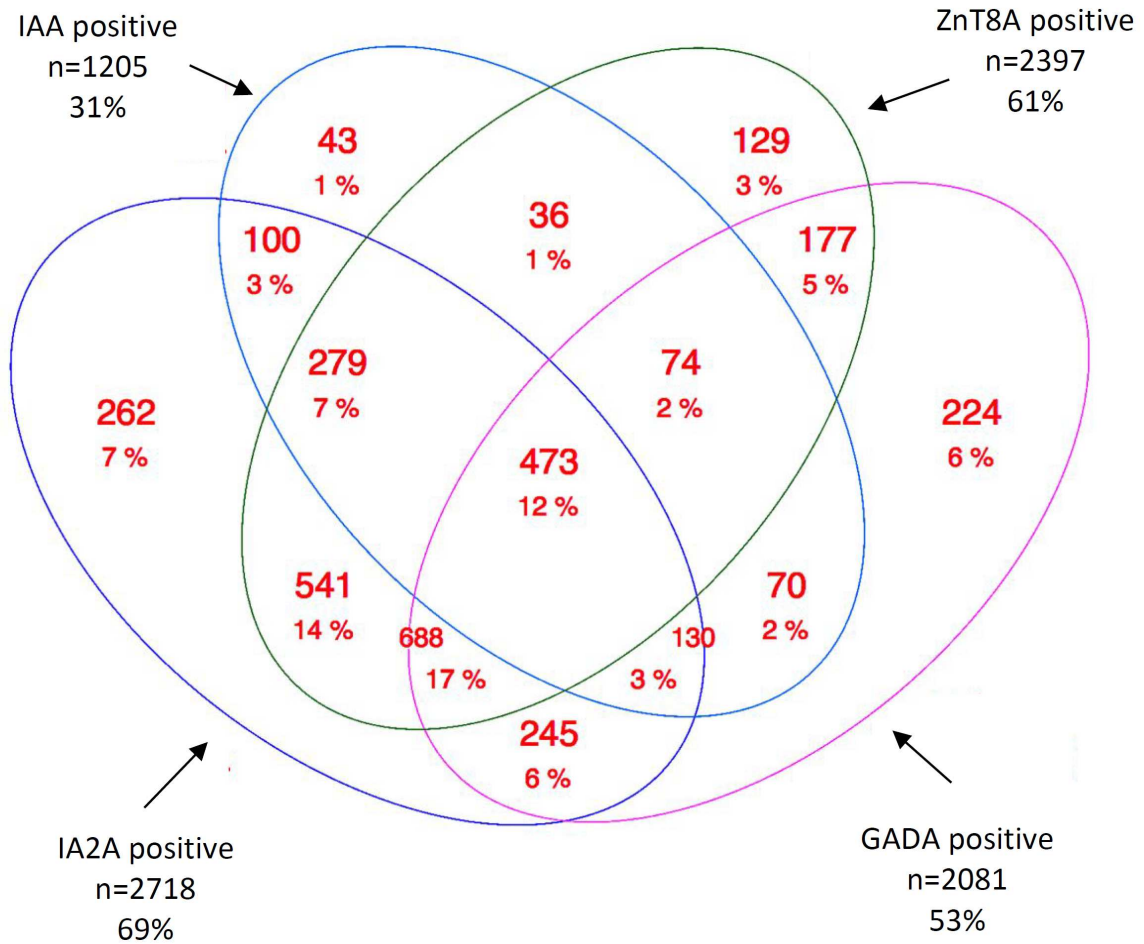

SUPPLEMENTARY DATA

**Supplementary Table 4. Characteristics of the patients referred for genetic testing (and not referred for genetic testing) by clinicians.** Plasma glucose and C peptide results based on log10 transformation.

| Phenotype                       | Patients Tested Clinically |                    | Patients Not Tested Clinically |                    | P                   |
|---------------------------------|----------------------------|--------------------|--------------------------------|--------------------|---------------------|
|                                 | N                          | mean (SD) or % (N) | N                              | mean (SD) or % (N) |                     |
| <b>Clinical features</b>        |                            |                    |                                |                    |                     |
| N                               | 81                         |                    | 3852                           |                    |                     |
| Sex (% female)                  | 81                         | 49 (40)            | 3852                           | 45 (1715)          | 0.43                |
| Age at diagnosis (yrs)          | 81                         | 11.8 (4.02)        | 3852                           | 10.1 (4.44)        | 3x10 <sup>-4</sup>  |
| Parental Diabetes (%)           | 81                         | 54 (44)            | 3852                           | 12 (456)           | 1x10 <sup>-19</sup> |
| Polyuria (%)                    | 69                         | 54 (37)            | 3539                           | 95 (3355)          | 5x10 <sup>-22</sup> |
| Polydipsia (%)                  | 69                         | 55 (38)            | 3528                           | 94 (3325)          | 1x10 <sup>-19</sup> |
| Weight loss (%)                 | 67                         | 31 (21)            | 3420                           | 76 (2604)          | 2x10 <sup>-14</sup> |
| BMI (SDS)                       | 67                         | 0.78 (1.46)        | 3311                           | -0.37 (1.55)       | 2x10 <sup>-8</sup>  |
| Acanthosis Nigricans (%)        | 66                         | 3 (2)              | 3424                           | 1 (42)             | 0.20                |
| <b>Investigations- early</b>    |                            |                    |                                |                    |                     |
| Plasma glucose (mmol/L)         | 69                         | 17.0 (8.9)         | 3500                           | 26.7 (9.0)         | 3x10 <sup>-13</sup> |
| HbA1c (%)                       | 76                         | 8.2 (4.8)          | 3465                           | 10.7 (4.5)         | 9x10 <sup>-12</sup> |
| DKA (%)                         | 81                         | 1 (1)              | 3852                           | 16 (600)           | 3x10 <sup>-5</sup>  |
| <b>Investigations – delayed</b> |                            |                    |                                |                    |                     |
| 4 Autoantibody negative (%)     | 81                         | 94 (76)            | 3852                           | 10 (386)           | 9x10 <sup>-67</sup> |
| High risk HLA (%)               | 81                         | 28 (23)            | 3795                           | 70 (2670)          | 2x10 <sup>-14</sup> |
| C peptide (nmol/mol)            | 72                         | 0.85 (0.69)        | 3524                           | 0.34 (0.43)        | 2x10 <sup>-12</sup> |
| C Peptide < 0.2 (nmol/mol) (%)  | 72                         | 13 (9)             | 3524                           | 40 (1425)          | 5x10 <sup>-7</sup>  |

SUPPLEMENTARY DATA

**Supplementary Table 5: Pathogenic MODY gene variants identified in the cohort**

| Study Number | Gene  | DNA description* | Protein Description* | Predicted Effect             | No. of heterozygotes in GnomAD† | Variant Classification‡ | References                                                         | Clinician requested test? |
|--------------|-------|------------------|----------------------|------------------------------|---------------------------------|-------------------------|--------------------------------------------------------------------|---------------------------|
| BDD0024      | GCK   | c.772G>T         | p.(Gly258Cys)        | Missense                     | 0/123027                        | Pathogenic              | <a href="#">Mantovani (2003) Hum Mutat 22, 338</a>                 | No                        |
| BDD0068      | GCK   | c.571C>T         | p.(Arg191Trp)        | Missense                     | 2/123005                        | Pathogenic              | <a href="#">Ellard (2000) Diabetologia 43, 250</a>                 | Yes                       |
| BDD0377      | HNF4A | c.47dup          | p.(Tyr16Ter)         | Nonsense                     | 0/15464                         | Pathogenic              | Novel                                                              | Yes                       |
| BDD0387      | GCK   | c.1016A>G        | p.(Glu339Gly)        | Missense                     | 0/118808                        | Pathogenic              | <a href="#">Sagen (2006) Diabetes 55, 1713</a>                     | Yes                       |
| BDD0422      | GCK   | c.766G>A         | p.(Glu256Lys)        | Missense                     | 1/123047                        | Pathogenic              | <a href="#">Gidh-Jain (1993) Proc Natl Acad Sci U S A 90, 1932</a> | Yes                       |
| BDD0647      | GCK   | c.704T>C         | p.(Met235Thr)        | Missense                     | 0/122988                        | Pathogenic              | <a href="#">Gloyn (2003) Hum Mutat 22, 353</a>                     | Yes                       |
| BDD0664      | HNF1A | c.872dup         | p.(Gly292fs)         | Frameshift                   | 0/132382                        | Pathogenic              | <a href="#">Yamagata (1996) Nature 384, 455</a>                    | Yes                       |
| BDD0665      | GCK   | c.675C>G         | p.(Ile225Met)        | Missense                     | 0/123114                        | Likely Pathogenic       | <a href="#">Massa (2001) Diabetologia 44, 898</a>                  | Yes                       |
| BDD0717      | HNF1A | c.872dup         | p.(Gly292fs)         | Frameshift                   | 0/132382                        | Pathogenic              | <a href="#">Yamagata (1996) Nature 384, 455</a>                    | Yes                       |
| BDD0809      | HNF4A | c.46_49+6delinsG | p.(?)                | Aberrant splicing            | 0/15464                         | Pathogenic              | Novel                                                              | Yes                       |
| BDD0840      | GCK   | c.766G>A         | p.(Glu256Lys)        | Missense                     | 1/123047                        | Pathogenic              | <a href="#">Gidh-Jain (1993) Proc Natl Acad Sci U S A 90, 1932</a> | Yes                       |
| BDD0842      | GCK   | c.854G>A         | p.(Gly285Asp)        | Missense                     | 0/120800                        | Likely Pathogenic       | Novel (1 family in MODY DB)                                        | Yes                       |
| BDD0911      | GCK   | c.766G>A         | p.(Glu256Lys)        | Missense                     | 1/123047                        | Pathogenic              | <a href="#">Gidh-Jain (1993) Proc Natl Acad Sci U S A 90, 1932</a> | Yes                       |
| BDD1002      | HNF4A | c.956_958dup     | p.(Leu319dup)        | In-frame amino acid deletion | 0/122264                        | Pathogenic              | <a href="#">Pearson (2005) Diabetologia 48, 878</a>                | Yes                       |
| BDD1107      | HNF1A | c.814C>T         | p.(Arg272Cys)        | Missense                     | 0/121947                        | Pathogenic              | <a href="#">Yoshiuchi (1999) Diabetologia 42, 621</a>              | Yes                       |
| BDD1337      | GCK   | c.680-2A>G       | p.(?)                | Aberrant splicing            | 0/122599                        | Pathogenic              | <a href="#">Osbak (2009) Hum Mutat 30, 1512</a>                    | Yes                       |
| BDD1433      | GCK   | c.442T>A         | p.(Phe148Ile)        | Missense                     | 0/123131                        | Likely Pathogenic       | <a href="#">Osbak (2009) Hum Mutat 30, 1512</a>                    | Yes                       |
| BDD1470      | GCK   | c.878T>G         | p.(Ile293Arg)        | Missense                     | 0/122348                        | Pathogenic              | Novel (3 families in MODY DB)                                      | Yes                       |
| BDD1515      | HNF4A | c.956_958dup     | p.(Leu319dup)        | In-frame amino acid deletion | 0/122264                        | Pathogenic              | <a href="#">Pearson (2005) Diabetologia 48, 878</a>                | Yes                       |
| BDD1526      | GCK   | c.704T>C         | p.(Met235Thr)        | Missense                     | 0/122988                        | Pathogenic              | <a href="#">Gloyn (2003) Hum Mutat 22, 353</a>                     | Yes                       |
| BDD1557      | HNF4A | c.1A>G           | p.(?)                | Start-loss                   | 0/122240                        | Pathogenic              | Novel                                                              | Yes                       |
| BDD1586      | GCK   | c.623C>T         | p.(Ala208Val)        | Missense                     | 1/123121                        | Pathogenic              | <a href="#">Osbak (2009) Hum Mutat 30, 1512</a>                    | Yes                       |
| BDD1930      | GCK   | c.490C>T         | p.(Leu164Phe)        | Missense                     | 0/15478                         | Likely Pathogenic       | <a href="#">Nam (2000) Diabetes Res Clin Pract 50, 169</a>         | Yes                       |
| BDD2002      | GCK   | c.766G>A         | p.(Glu256Lys)        | Missense                     | 1/123047                        | Pathogenic              | <a href="#">Gidh-Jain (1993) Proc Natl Acad Sci U S A 90, 1932</a> | Yes                       |
| BDD2035      | GCK   | c.1144T>C        | p.(Cys382Arg)        | Missense                     | 0/115895                        | Pathogenic              | <a href="#">Osbak (2009) Hum Mutat 30, 1512</a>                    | Yes                       |
| BDD2161      | GCK   | c.680-2A>G       | p.(?)                | Aberrant splicing            | 0/122599                        | Pathogenic              | <a href="#">Osbak (2009) Hum Mutat 30, 1512</a>                    | No                        |
| BDD2282      | HNF1A | c.493T>C         | p.(Trp165Arg)        | Missense                     | 0/138536                        | Pathogenic              | <a href="#">Tatsi (2013) Pediatr Diabetes epub, epub</a>           | Yes                       |

## SUPPLEMENTARY DATA

|         |       |                  |               |            |          |                   |                                                                    |     |
|---------|-------|------------------|---------------|------------|----------|-------------------|--------------------------------------------------------------------|-----|
| BDD2362 | GCK   | c.929T>G         | p.(Val310Gly) | Missense   | 1/121775 | Likely Pathogenic | Novel (2 families in MODY DB)                                      | Yes |
| BDD2549 | HNF4A | c.931C>T         | p.(Arg311Cys) | Missense   | 0/121920 | Pathogenic        | <a href="#">Yorifuji (2012) Pediatr Diabetes 13, 26</a>            | No  |
| BDD2655 | GCK   | c.869A>G         | p.(Glu290Gly) | Missense   | 0/121651 | Likely Pathogenic | Novel                                                              | No  |
| BDD2788 | HNF1A | c.1340C>T        | p.(Pro447Leu) | Missense   | 0/15467  | Pathogenic        | <a href="#">Yamagata (1996) Nature 384, 455</a>                    | No  |
| BDD2801 | GCK   | c.1305dup        | p.(Ile436fs)  | Frameshift | 0/120231 | Pathogenic        | Novel                                                              | No  |
| BDD2844 | GCK   | c.1142T>C        | p.(Met381Thr) | Missense   | 0/115895 | Pathogenic        | <a href="#">Osbak (2009) Hum Mutat 30, 1512</a>                    | Yes |
| BDD2952 | GCK   | c.162T>G         | p.(Ser54Arg)  | Missense   | 3/123132 | Likely Pathogenic | Novel (2 families in MODY DB)                                      | Yes |
| BDD3040 | GCK   | c.704T>C         | p.(Met235Thr) | Missense   | 0/122988 | Pathogenic        | <a href="#">Gloyn (2003) Hum Mutat 22, 353</a>                     | No  |
| BDD3079 | GCK   | c.766G>A         | p.(Glu256Lys) | Missense   | 1/123047 | Pathogenic        | <a href="#">Gidh-Jain (1993) Proc Natl Acad Sci U S A 90, 1932</a> | Yes |
| BDD3233 | GCK   | c.571C>T         | p.(Arg191Trp) | Missense   | 2/123005 | Pathogenic        | <a href="#">Ellard (2000) Diabetologia 43, 250</a>                 | Yes |
| BDD3254 | GCK   | c.704T>C         | p.(Met235Thr) | Missense   | 0/122988 | Pathogenic        | <a href="#">Gloyn (2003) Hum Mutat 22, 353</a>                     | Yes |
| BDD3490 | HNF4A | c.47dup          | p.(Tyr16Ter)  | Nonsense   | 0/15464  | Pathogenic        | Novel                                                              | No  |
| BDD3591 | HNF1A | c.160C>T         | p.(Arg54Ter)  | Nonsense   | 0/116545 | Pathogenic        | <a href="#">Lambert (2003) Diabetes Care 26, 333</a>               | No  |
| BDD3640 | GCK   | c.854G>A         | p.(Gly285Asp) | Missense   | 0/120800 | Likely Pathogenic | Novel (1 family in MODY DB)                                        | No  |
| BDD3791 | HNF1A | c.25C>T          | p.(Gln9Ter)   | Nonsense   | 0/121466 | Pathogenic        | Novel                                                              | Yes |
| BDD3798 | HNF1A | c.431T>C         | p.(Leu144Pro) | Missense   | 0/123112 | Pathogenic        | <a href="#">Colclough (2013) Hum Mutat 34, 669</a>                 | No  |
| BDD3961 | HNF1A | c.366C>G         | p.(Tyr122Ter) | Nonsense   | 0/123098 | Pathogenic        | Novel                                                              | Yes |
| BDD3973 | GCK   | c.1167_1168dupCA | p.(Ile390fs)  | Frameshift | 0/112573 | Pathogenic        | Novel                                                              | Yes |
| BDD3980 | HNF1A | c.872dup         | p.(Gly292fs)  | Frameshift | 0/132382 | Pathogenic        | <a href="#">Yamagata (1996) Nature 384, 455</a>                    | No  |

\*Variants described according to Human Genome Variation Society (HGVS) nomenclature guidelines v15.11 and using the reference sequences NM\_000162.3 for *GCK*, NM\_000545.6 for *HNF1A*, NM\_175914.4 for *HNF4A* and NM\_000458.3 for *HNF1B*.

†GnomAD data is number of heterozygous individuals identified out of the total number of individuals with genotype quality (GQ) >= 20 and depth (DP) >= 10 over a 10bp window containing the variant. GnomAD data accessed on 03/11/2017.

‡Variants classified according to the ACGS and ACMG best practice guidelines for variant interpretation and classification ([http://www.acgs.uk.com/media/1092626/uk\\_practice\\_guidelines\\_for\\_variant\\_classification\\_2017.pdf](http://www.acgs.uk.com/media/1092626/uk_practice_guidelines_for_variant_classification_2017.pdf) and [https://www.acmg.net/docs/Standards\\_Guidelines\\_for\\_the\\_Interpretation\\_of\\_Sequence\\_Variants.pdf](https://www.acmg.net/docs/Standards_Guidelines_for_the_Interpretation_of_Sequence_Variants.pdf)).



SUPPLEMENTARY DATA

**Supplementary Figure 2. Fasting plasma glucose in known MODY patients (both GCK and HNF1A/HNF4A) and those without known MODY (autoantibody negative and autoantibody positive).**

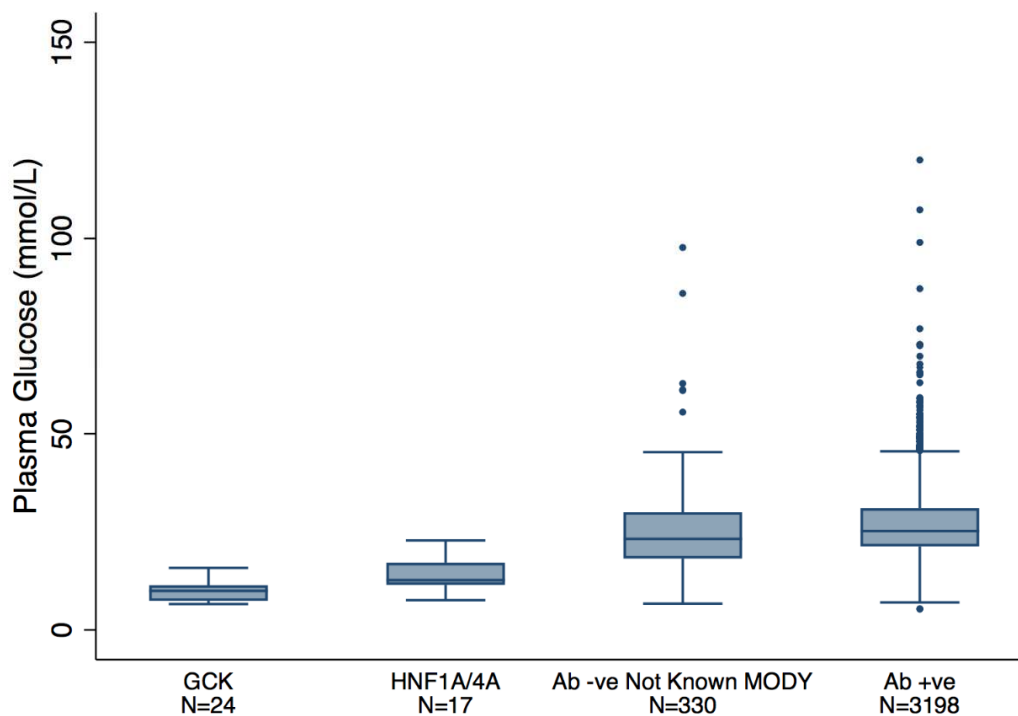

SUPPLEMENTARY DATA

**Supplementary Table 6. Differences in autoantibody negative patients with or without MODY.** This table consist of only the 303 antibody negative patients who were sequenced for MODY. Plasma glucose and C peptide results based on log10 transformation.

| Phenotype                       | MODY |                       | Not MODY |                       | P                   |
|---------------------------------|------|-----------------------|----------|-----------------------|---------------------|
|                                 | N    | mean (SD)<br>or % (N) | N        | mean (SD)<br>or % (N) |                     |
| <b>Clinical features</b>        |      |                       |          |                       |                     |
| N                               | 46   |                       | 257      |                       |                     |
| Sex (% female)                  | 46   | 54 (25)               | 257      | 38 (98)               | 0.05                |
| Age at diagnosis (yrs)          | 46   | 12.1 (4.39)           | 257      | 12.0 (4.39)           | 0.84                |
| Parental Diabetes (%)           | 46   | 63 (29)               | 257      | 27 (68)               | 4x10 <sup>-6</sup>  |
| Polyuria (%)                    | 38   | 34 (13)               | 215      | 79 (169)              | 1x10 <sup>-7</sup>  |
| Polydipsia (%)                  | 38   | 34 (13)               | 212      | 80 (169)              | 6x10 <sup>-8</sup>  |
| Weight loss (%)                 | 38   | 16 (6)                | 202      | 57 (115)              | 2x10 <sup>-6</sup>  |
| BMI (SDS)                       | 37   | 0.54 (1.21)           | 203      | 0.50 (1.92)           | 0.85                |
| Acanthosis Nigricans (%)        | 37   | 0 (0.00)              | 202      | 9 (18)                | 0.08                |
| <b>Investigations- early</b>    |      |                       |          |                       |                     |
| Plasma glucose (mmol/L)         | 41   | 11.7 (4.13)           | 209      | 23.7 (10.0)           | 7x10 <sup>-18</sup> |
| HbA1c (%)                       | 46   | 7.0 (3.7)             | 211      | 10.2 (5.0)            | 4x10 <sup>-19</sup> |
| DKA (%)                         | 46   | 0 (0)                 | 257      | 5 (14)                | 0.14                |
| <b>Investigations – delayed</b> |      |                       |          |                       |                     |
| High risk HLA (%)               | 46   | 20 (9)                | 256      | 45 (116)              | 1x10 <sup>-3</sup>  |
| C peptide (nmol/mol)            | 41   | 0.81 (0.63)           | 240      | 0.48 (0.99)           | 1x10 <sup>-4</sup>  |
| C Peptide < 0.2 nmol/mol (%)    | 41   | 2 (1)                 | 240      | 23 (54)               | 1x10 <sup>-3</sup>  |

SUPPLEMENTARY DATA

**Supplementary Table 7. GCK-MODY only vs. not known-MODY.** Plasma glucose and C peptide results based on log10 transformation

| Phenotype                       | GCK MODY |                       | Not known MODY |                       | P                   |
|---------------------------------|----------|-----------------------|----------------|-----------------------|---------------------|
|                                 | N        | mean (SD)<br>or % (N) | N              | mean (SD)<br>or % (N) |                     |
| <b>Clinical features</b>        |          |                       |                |                       |                     |
| N                               | 29       |                       | 3887           |                       |                     |
| Sex (% female)                  | 29       | 41 (12)               | 3887           | 45 (1730)             | 0.85                |
| Age at diagnosis (yrs)          | 29       | 11.0 (4.8)            | 3887           | 10.1 (4.4)            | 0.25                |
| Parental Diabetes (%)           | 29       | 62 (18)               | 3887           | 12 (471)              | 4x10 <sup>-10</sup> |
| Polyuria (%)                    | 23       | 26 (6)                | 3570           | 95 (3379)             | 4x10 <sup>-17</sup> |
| Polydipsia (%)                  | 23       | 26 (6)                | 3559           | 94 (3350)             | 2x10 <sup>-16</sup> |
| Weight loss (%)                 | 23       | 13 (3)                | 3449           | 76 (2619)             | 4x10 <sup>-10</sup> |
| BMI (SDS)                       | 22       | 0.50 (1.23)           | 3341           | -0.36 (1.55)          | 4x10 <sup>-3</sup>  |
| Acanthosis Nigricans (%)        | 22       | 0 (0)                 | 3453           | 1 (44)                | 1                   |
| <b>Investigations- early</b>    |          |                       |                |                       |                     |
| Plasma glucose (mmol/L)         | 24       | 9.9 (2.5)             | 3528           | 26.7 (9.0)            | 7x10 <sup>-16</sup> |
| HbA1c (%)                       | 29       | 6.3 (2.5)             | 3495           | 10.7 (4.5)            | 2x10 <sup>-47</sup> |
| DKA (%)                         | 29       | 0 (0)                 | 3887           | 15 (601)              | 0.02                |
| <b>Investigations – delayed</b> |          |                       |                |                       |                     |
| 4 Antibody negative (%)         | 29       | 100 (29)              | 3887           | 11 (416)              | 2x10 <sup>-28</sup> |
| High risk HLA (%)               | 29       | 14 (4)                | 3830           | 70 (2684)             | 6x10 <sup>-10</sup> |
| C peptide (nmol/mol)            | 26       | 0.92 (0.62)           | 3555           | 0.34 (0.43)           | 3x10 <sup>-8</sup>  |
| C Peptide < 0.2 nmol/mol (%)    | 26       | 4 (1)                 | 3555           | 40 (1433)             | 1x10 <sup>-4</sup>  |

SUPPLEMENTARY DATA

**Supplementary Table 8. HNF1A/HNF4A MODY vs. Not known MODY.**

| Phenotype                       | HNF1A/HNF4A MODY |                    | Not known MODY |                    | P                   |
|---------------------------------|------------------|--------------------|----------------|--------------------|---------------------|
|                                 | N                | mean (SD) or % (N) | N              | mean (SD) or % (N) |                     |
| <b>Clinical features</b>        |                  |                    |                |                    |                     |
| N                               | 17               |                    | 3887           |                    |                     |
| Sex (% female)                  | 17               | 76 (13)            | 3887           | 45 (1730)          | 0.01                |
| Age at diagnosis (yrs)          | 17               | 13.8 (3.2)         | 3887           | 10.1 (4.4)         | 2x10 <sup>-4</sup>  |
| Parental Diabetes (%)           | 17               | 65 (11)            | 3887           | 12 (471)           | 6x10 <sup>-7</sup>  |
| Polyuria (%)                    | 15               | 47 (7)             | 3570           | 95 (3379)          | 4x10 <sup>-7</sup>  |
| Polydipsia (%)                  | 15               | 47 (7)             | 3559           | 94 (3350)          | 7x10 <sup>-7</sup>  |
| Weight loss (%)                 | 15               | 0.2 (3)            | 3449           | 76 (2619)          | 9x10 <sup>-6</sup>  |
| BMI (SDS)                       | 15               | 0.61 (1.2)         | 3341           | -0.36 (1.6)        | 0.009               |
| Acanthosis Nigricans (%)        | 15               | 0 (0)              | 3453           | 1 (44)             | 1                   |
| <b>Investigations- early</b>    |                  |                    |                |                    |                     |
| Plasma glucose (mmol/L)         | 17               | 14.2 (4.8)         | 3528           | 26.7 (9.0)         | 7x10 <sup>-7</sup>  |
| HbA1c (%)                       | 17               | 8.3 (2.4)          | 3495           | 10.7 (4.5)         | 1x10 <sup>-4</sup>  |
| DKA (%)                         | 17               | 0 (0)              | 3887           | 15 (601)           | 0.09                |
| <b>Investigations – delayed</b> |                  |                    |                |                    |                     |
| 4 Antibody negative (%)         | 17               | 100 (17)           | 3887           | 11 (416)           | 4x10 <sup>-17</sup> |
| High risk HLA (%)               | 17               | 29 (5)             | 3830           | 70 (2684)          | 7x10 <sup>-4</sup>  |
| C peptide (nmol/mol)            | 15               | 1.10 (0.63)        | 3555           | 0.34 (0.43)        | 6x10 <sup>-8</sup>  |
| C Peptide < 0.2 nmol/mo (%)     | 15               | 0 (0)              | 3555           | 40 (1433)          | 7x10 <sup>-4</sup>  |

Plasma glucose and C peptide results based on log10 transformation.

SUPPLEMENTARY DATA

**Supplementary Table 9. HNF1A/HNF4A MODY vs. GCK MODY.** Plasma glucose and C peptide results based on log10 transformation.

| Phenotype                      | GCK MODY |                       | HNF1A/4A MODY |                       | P                  |
|--------------------------------|----------|-----------------------|---------------|-----------------------|--------------------|
|                                | N        | mean (SD)<br>or % (N) | N             | mean (SD)<br>or % (N) |                    |
| Clinical features              |          |                       |               |                       |                    |
| N                              | 29       |                       | 17            |                       |                    |
| Sex (% female)                 | 29       | 41 (12)               | 17            | 76 (13)               | 0.03               |
| Age at diagnosis (yrs)         | 29       | 11.0 (4.8)            | 17            | 13.8 (3.2)            | 0.04               |
| Parental Diabetes (%)          | 29       | 62 (18)               | 17            | 65 (11)               | 1.00               |
| Polyuria (%)                   | 23       | 26 (6)                | 15            | 47 (7)                | 0.30               |
| Polydipsia (%)                 | 23       | 26 (6)                | 15            | 47 (7)                | 0.30               |
| Weight loss (%)                | 23       | 13 (3)                | 15            | 20 (3)                | 0.66               |
| BMI (SDS)                      | 22       | 0.50 (1.23)           | 15            | 0.61 (1.2)            | 0.79               |
| Acanthosis Nigricans (%)       | 22       | 0 (0)                 | 15            | 0 (0)                 | 1.00               |
|                                |          |                       |               |                       |                    |
| Investigations- early          |          |                       |               |                       |                    |
| Plasma glucose (mmol/L)        | 24       | 9.9 (2.5)             | 17            | 14.2 (4.8)            | 6x10 <sup>-4</sup> |
| HbA1c (%)                      | 29       | 6.3 (2.5)             | 17            | 8.3 (2.4)             | 0.01               |
| DKA (%)                        | 29       | 0 (0)                 | 17            | 0 (0)                 | 1.00               |
|                                |          |                       |               |                       |                    |
| Investigations – delayed#      |          |                       |               |                       |                    |
| 4 Antibody negative (%)        | 29       | 100 (29)              | 17            | 100 (17)              | 1.00               |
| High risk HLA (%)              | 29       | 14 (4)                | 17            | 29 (5)                | 0.26               |
| C peptide (nmol/mol)           | 26       | 0.92 (0.62)           | 15            | 1.10 (0.63)           | 0.38               |
| C Peptide < 0.2 (nmol/mol) (%) | 26       | 4 (1)                 | 15            | 0 (0)                 | 1.00               |

SUPPLEMENTARY DATA

**Supplementary Table 10. Effectiveness of HbA1c and family history on identifying MODY in autoantibody negative individuals.**

| Criteria                                      | Total number autoantibody negative | Total number of individuals tested for MODY | Number (%) of the 46 MODY patients detected |
|-----------------------------------------------|------------------------------------|---------------------------------------------|---------------------------------------------|
| All                                           | 380                                | 257                                         | 46 (100%)                                   |
| HbA1c<7.5% (58mmol/mol)                       | 100 (26%)                          | 73 (28%)                                    | 36 (78%)                                    |
| Parent affected                               | 120 (32%)                          | 96 (37%)                                    | 29 (63%)                                    |
| HbA1c < 7.5% (58mmol/mol) or parent affected  | 174 (46%)                          | 131 (51%)                                   | 44 (96%)                                    |
| HbA1c < 7.5% (58mmol/mol) and parent affected | 46 (12%)                           | 38 (15%)                                    | 21 (46%)                                    |

\*Note this table only includes the patients who had HbA1c at diagnosis data. This was available on 380 of 462 patients that were negative for all 4 autoantibodies and 257 of 303 patients that were negative for all 4 autoantibodies and were sequenced. Parental history was available on all subjects. The percentages shown are of the patients in whom HbA1c was available

SUPPLEMENTARY DATA

**Supplementary Table 11. Initial and present treatment**

| No | Study Number | Sex | Age  | Initial diagnosis | Initial treatment | Clinical / Research Diagnostic Test | Current Treatment | HbA1c mmol/mol | Follow up years |
|----|--------------|-----|------|-------------------|-------------------|-------------------------------------|-------------------|----------------|-----------------|
| 1  | BDD0024      | M   | 5.4  | Unclassified      | None              | Clinical GCK                        | None              | 42             | 8               |
| 2  | BDD0068      | M   | 11.1 | Unclassified      | None              | Clinical GCK                        | None              | 47             | 7.5             |
| 3  | BDD0377      | M   | 15   | susp MODY         | Insulin           | Clinical GCK                        | None              | 40             | 3               |
| 4  | BDD0387      | F   | 15.6 | Type 2            | Diet              | Clinical GCK                        | None              | 47             | 9.5             |
| 5  | BDD0422      | M   | 16.1 | susp MODY         | Diet              | Clinical GCK                        | None              | 51             | 3               |
| 6  | BDD0647      | M   | 16.4 | susp MODY         | Diet              | Clinical GCK                        | None              | 38             | 4.5             |
| 7  | BDD0664      | F   | 16   | susp MODY         | Diet              | Clinical GCK                        | None              | 42             | 2               |
| 8  | BDD0665      | F   | 13.7 | susp MODY         | Diet              | Clinical GCK                        | None              | 34             | 2               |
| 9  | BDD0717      | M   | 6.5  | susp MODY         | Diet              | Clinical GCK                        | None              | 51             | 4               |
| 10 | BDD0809      | F   | 16.2 | susp MODY         | Diet              | Clinical GCK                        | None              | 42             | 2               |
| 11 | BDD0840      | F   | 5.8  | susp MODY         | Diet              | Clinical GCK                        | None              | 47             | 10              |
| 12 | BDD0842      | F   | 6.6  | Type 1            | Diet              | Clinical GCK                        | None              | 46             | 8               |
| 13 | BDD0911      | M   | 9.9  | susp MODY         | Insulin           | Clinical GCK                        | None              | 46             | 10              |
| 14 | BDD1002      | F   | 17   | Type 2            | Metformin         | Clinical GCK                        | None              | 51             | 1.5             |
| 15 | BDD1107      | M   | 7.8  | susp MODY         | Diet              | Clinical GCK                        | None              | 47             | 8.5             |
| 16 | BDD1337      | M   | 5.5  | susp MODY         | Diet              | Clinical GCK                        | None              | 41             | 9               |
| 17 | BDD1433      | F   | 14.4 | susp MODY         | Insulin           | Clinical GCK                        | None              | 40             | 8               |
| 18 | BDD1470      | F   | 11.8 | susp MODY         | Diet              | Clinical GCK                        | None              | 42             | 6               |
| 19 | BDD1515      | M   | 16.9 | susp MODY         | None              | Clinical GCK                        | None              | 47             | 0               |

SUPPLEMENTARY DATA

|    |         |   |      |           |           |          |       |                        |    |     |
|----|---------|---|------|-----------|-----------|----------|-------|------------------------|----|-----|
| 20 | BDD1526 | M | 15   | susp MODY | Diet      | Clinical | GCK   | None                   | 48 | 0   |
| 21 | BDD1557 | M | 13.9 | Type 1    | Insulin   | Clinical | GCK   | None                   | 44 | 2   |
| 22 | BDD1586 | F | 3.7  | susp MODY | None      | Clinical | GCK   | None                   | 44 | 6.5 |
| 23 | BDD1930 | M | 4.9  | Type 1    | Insulin   | Clinical | GCK   | None                   | 48 | 1   |
| 24 | BDD2002 | F | 11.5 | Type 1    | Insulin   | Clinical | HNF1A | Sulphonylurea+Insulin* | 47 | 6.5 |
| 25 | BDD2035 | F | 15.5 | Type 2    | Metformin | Clinical | HNF1A | Sulphonylurea          | 36 | 5   |
| 26 | BDD2161 | F | 15.5 | susp MODY | Insulin   | Clinical | HNF1A | None                   | 45 | 8   |
| 27 | BDD2282 | F | 11   | Type 2    | Diet      | Clinical | HNF1A | Sulphonylurea          | 59 | 9.5 |
| 28 | BDD2362 | M | 13.9 | susp MODY | Insulin   | Clinical | HNF1A | None                   | 40 | 11  |
| 29 | BDD2549 | M | 7.9  | susp MODY | None      | Clinical | HNF1A | Sulphonylurea          | 68 | 10  |
| 30 | BDD2655 | F | 15.1 | Type 1    | Insulin   | Clinical | HNF4A | None                   | 52 | 10  |
| 31 | BDD2788 | F | 7.2  | susp.MODY | Diet      | Clinical | HNF4A | Sulphonylurea          | 55 | 10  |
| 32 | BDD2801 | F | 11.8 | susp MODY | Insulin   | Clinical | HNF4A | Insulin**              | 72 | 4.5 |
| 33 | BDD2844 | F | 15.4 | Type 1    | Insulin   | Clinical | HNF4A | Insulin***             | 60 | 9   |
| 34 | BDD2952 | M | 16.5 | Type 1    | Insulin   | Clinical | HNF4A | Insulin****            | 67 | 7.5 |
| 35 | BDD3040 | M | 11   | unclass.  | Diet      | Research | GCK   | None                   | 46 | 7   |
| 36 | BDD3079 | M | 15.5 | Type 1    | Diet      | Research | GCK   | None                   | 36 | 2.5 |
| 37 | BDD3233 | F | 2.8  | Type 1    | Insulin   | Research | GCK   | None                   | 46 | 7   |
| 38 | BDD3254 | F | 4    | Type 1    | Insulin   | Research | GCK   | None                   | 53 | 7   |
| 39 | BDD3490 | M | 13.2 | Type 2    | Metformin | Research | GCK   | None                   | 43 | 5   |
| 40 | BDD3591 | M | 9.7  | susp MODY | None      | Research | GCK   | None                   | 42 | 11  |



## SUPPLEMENTARY DATA

|    |         |   |      |           |                   |                       |                       |    |     |
|----|---------|---|------|-----------|-------------------|-----------------------|-----------------------|----|-----|
| 41 | BDD3640 | F | 10.8 | susp MODY | None              | Research <i>HNF1A</i> | None                  | 49 | 6.5 |
| 42 | BDD3791 | F | 15.8 | Type 1    | Insulin.          | Research <i>HNF1A</i> | Sulphonylurea+Januvia | 40 | 9   |
| 43 | BDD3798 | F | 17.1 | Type 2    | Insulin+Metformin | Research <i>HNF1A</i> | Sulphonylurea         | 56 | 1   |
| 44 | BDD3961 | M | 15.7 | Type 1    | Insulin           | Research <i>HNF1A</i> | Sulphonylurea         | 69 | 2.5 |
| 45 | BDD3973 | F | 16.9 | Type 2    | Diet              | Research <i>HNF4A</i> | None                  | 33 | 1   |
| 46 | BDD3980 | F | 17   | Type 1    | Insulin           | Research <i>HNF4A</i> | Sulphonylurea         | 50 | 6.5 |

Age = age at diagnosis of diabetes, susp = suspected, HbA1c after molecular genetic diagnosis

\*Patient chose to stay on insulin in addition to sulphonylurea, \*\*reported worse control on sulphonylurea so recommended insulin, \*\*\* has not tried Sulphonylurea, \*\*\*\*tried glibenclamide, but chose to continue Insulin

SUPPLEMENTARY DATA

**Supplementary Table 12. Characteristics of the patients referred for genetic testing and autoantibody negative patients not referred for genetic testing by clinicians.** Plasma glucose and C peptide results based on log<sub>10</sub> transformation.

| Phenotype                       | Antibody Negative Patients Clinically Tested |                    | Antibody Negative Patients Not Clinically Tested |                    | P                  |
|---------------------------------|----------------------------------------------|--------------------|--------------------------------------------------|--------------------|--------------------|
|                                 | N                                            | mean (SD) or % (N) | N                                                | mean (SD) or % (N) |                    |
| <b>Clinical features</b>        |                                              |                    |                                                  |                    |                    |
| N                               | 76                                           |                    | 386                                              |                    |                    |
| Sex (% female)                  | 76                                           | 50 (38)            | 386                                              | 39 (151)           | 0.10               |
| Age at diagnosis (yrs)          | 76                                           | 11.7 (4.1)         | 386                                              | 11.6 (4.6)         | 0.75               |
| Parental Diabetes (%)           | 76                                           | 54 (41)            | 386                                              | 21 (80)            | 2x10 <sup>-8</sup> |
| Polyuria (%)                    | 64                                           | 50 (32)            | 311                                              | 82 (256)           | 2x10 <sup>-7</sup> |
| Polydipsia (%)                  | 64                                           | 52 (33)            | 308                                              | 82 (253)           | 9x10 <sup>-7</sup> |
| Weight loss (%)                 | 62                                           | 27 (17)            | 296                                              | 63 (185)           | 5x10 <sup>-7</sup> |
| BMI SDS                         | 62                                           | 0.75 (1.38)        | 296                                              | 0.37 (1.91)        | 0.07               |
| Acanthosis Nigricans (%)        | 61                                           | 3 (2)              | 293                                              | 9 (25)             | 0.19               |
| <b>Investigations - early</b>   |                                              |                    |                                                  |                    |                    |
| Plasma glucose (mmol/L)         | 64                                           | 16.3 (8.5)         | 307                                              | 24.6 (10.7)        | 1x10 <sup>-9</sup> |
| HbA1c (%)                       | 71                                           | 8.1 (4.8)          | 309                                              | 10.3 (5.0)         | 1x10 <sup>-8</sup> |
| DKA (%)                         | 76                                           | 1 (1)              | 386                                              | 7 (26)             | 0.10               |
| <b>Investigations – delayed</b> |                                              |                    |                                                  |                    |                    |
| High risk HLA (%)               | 76                                           | 29 (22)            | 381                                              | 45 (185)           | 0.002              |
| C peptide (nmol/mol)            | 68                                           | 0.89 (0.69)        | 344                                              | 0.85 (1.03)        | 0.02               |
| C Peptide < 0.2 (nmol/mol)      | 68                                           | 12 (8)             | 344                                              | 26 (89)            | 0.012              |
